# Supplementary material for: Representability of algebraic topology for biomolecules in machine learning based scoring and virtual screening
Source: PubMed Central journal article supplement (PMC5774846; doi:10.1371/journal.pcbi.1005929), 2018-01-08
Supplement: pcbi.1005929.s001.pdf [file pcbi.1005929.s001.pdf]

# Supporting information

## Representability of algebraic topology for biomolecules in machine learning based scoring and virtual screening

Zixuan Cang<sup>1</sup>, Lin Mu<sup>2</sup>, and Guo-Wei Wei<sup>1,3,4</sup> \*

<sup>1</sup> Department of Mathematics

Michigan State University, MI 48824, USA

<sup>2</sup> Computer Science and Mathematics Division

Oak Ridge National Laboratory, Oak Ridge, USA

<sup>3</sup> Department of Biochemistry and Molecular Biology

Michigan State University, MI 48824, USA

<sup>4</sup> Department of Electrical and Computer Engineering

Michigan State University, MI 48824, USA

November 8, 2017

| Feature<br>Protein cluster | $F^S$ Alpha complex |                   |                   |                   |                   |                   |                   | $F^C$ Alpha complex |                   |                   |                   |                   |                   |                   |
|----------------------------|---------------------|-------------------|-------------------|-------------------|-------------------|-------------------|-------------------|---------------------|-------------------|-------------------|-------------------|-------------------|-------------------|-------------------|
|                            | 1                   | 2                 | 3                 | 4                 | 5                 | 6                 | 7                 | 1                   | 2                 | 3                 | 4                 | 5                 | 6                 | 7                 |
| NOH                        | 0.64(1.73)          | 0.79(1.30)        | 0.63(1.64)        | <b>0.63(1.40)</b> | <b>0.82(1.36)</b> | 0.63(1.68)        | 0.67(1.37)        | 0.53(1.96)          | <b>0.76(1.39)</b> | 0.45(2.05)        | 0.50(1.63)        | <b>0.76(1.58)</b> | 0.39(2.12)        | 0.57(1.58)        |
| OSH                        | 0.64(1.74)          | 0.79(1.30)        | 0.61(1.66)        | <b>0.63(1.39)</b> | <b>0.79(1.45)</b> | 0.56(1.79)        | <b>0.78(1.17)</b> | 0.45(2.10)          | <b>0.75(1.41)</b> | 0.37(2.16)        | 0.49(1.64)        | 0.74(1.63)        | 0.52(1.88)        | 0.64(1.47)        |
| NOSH                       | 0.65(1.72)          | 0.78(1.34)        | 0.64(1.61)        | <b>0.64(1.38)</b> | <b>0.81(1.40)</b> | 0.61(1.71)        | 0.67(1.37)        | 0.54(1.96)          | 0.74(1.44)        | 0.51(1.91)        | <b>0.58(1.48)</b> | 0.74(1.62)        | 0.40(2.09)        | 0.58(1.57)        |
| CNS                        | 0.62(1.77)          | <b>0.82(1.23)</b> | 0.65(1.61)        | 0.52(1.54)        | <b>0.79(1.46)</b> | <b>0.65(1.65)</b> | 0.70(1.32)        | 0.41(2.24)          | 0.72(1.53)        | 0.55(1.82)        | 0.50(1.70)        | <b>0.75(1.64)</b> | <b>0.54(1.99)</b> | <b>0.69(1.38)</b> |
| CNO                        | 0.62(1.77)          | <b>0.82(1.23)</b> | <b>0.66(1.58)</b> | 0.60(1.44)        | 0.78(1.48)        | <b>0.64(1.65)</b> | 0.60(1.49)        | <b>0.58(1.90)</b>   | <b>0.75(1.43)</b> | <b>0.58(1.79)</b> | <b>0.58(1.53)</b> | 0.73(1.67)        | 0.51(1.99)        | 0.50(1.73)        |
| OH                         | 0.63(1.77)          | 0.79(1.30)        | 0.58(1.73)        | 0.60(1.44)        | <b>0.80(1.43)</b> | 0.56(1.79)        | <b>0.78(1.16)</b> | 0.51(1.98)          | 0.73(1.46)        | 0.43(2.03)        | 0.41(1.75)        | <b>0.79(1.45)</b> | 0.52(1.88)        | <b>0.68(1.38)</b> |
| CN                         | 0.63(1.77)          | 0.80(1.27)        | 0.64(1.63)        | 0.52(1.55)        | 0.78(1.48)        | 0.61(1.72)        | <b>0.73(1.27)</b> | 0.48(2.10)          | 0.74(1.47)        | <b>0.58(1.78)</b> | 0.41(1.83)        | <b>0.76(1.59)</b> | 0.51(2.07)        | <b>0.71(1.35)</b> |
| CNOSPFClBrH                | 0.64(1.74)          | 0.81(1.25)        | <b>0.65(1.60)</b> | 0.55(1.51)        | 0.73(1.63)        | 0.60(1.73)        | <b>0.74(1.26)</b> | 0.49(2.06)          | 0.71(1.55)        | 0.33(2.31)        | 0.35(1.94)        | 0.67(1.82)        | <b>0.54(1.91)</b> | 0.57(1.57)        |
| COSH                       | <b>0.66(1.70)</b>   | 0.80(1.29)        | <b>0.65(1.59)</b> | 0.54(1.52)        | 0.74(1.61)        | 0.55(1.80)        | 0.72(1.28)        | <b>0.60(1.83)</b>   | 0.69(1.58)        | 0.46(1.99)        | <b>0.55(1.59)</b> | 0.63(1.90)        | 0.48(2.02)        | 0.42(1.80)        |
| CS                         | 0.62(1.78)          | <b>0.82(1.23)</b> | 0.57(1.81)        | 0.59(1.45)        | 0.74(1.60)        | <b>0.66(1.63)</b> | 0.66(1.39)        | 0.50(2.09)          | 0.67(1.65)        | 0.52(1.90)        | 0.44(1.78)        | 0.72(1.71)        | 0.51(2.06)        | 0.60(1.50)        |
| NH                         | 0.64(1.74)          | 0.79(1.30)        | 0.61(1.66)        | <b>0.63(1.39)</b> | 0.78(1.48)        | 0.62(1.69)        | 0.57(1.53)        | <b>0.62(1.79)</b>   | 0.72(1.50)        | 0.54(1.87)        | <b>0.59(1.47)</b> | 0.74(1.62)        | 0.48(1.94)        | 0.49(1.69)        |
| CNOSH                      | 0.64(1.75)          | 0.80(1.28)        | <b>0.66(1.58)</b> | 0.57(1.48)        | 0.73(1.62)        | 0.60(1.72)        | 0.64(1.42)        | 0.48(2.06)          | 0.73(1.50)        | 0.30(2.33)        | 0.33(1.94)        | 0.67(1.81)        | <b>0.55(1.91)</b> | 0.36(1.95)        |
| NSH                        | 0.63(1.75)          | 0.79(1.31)        | 0.63(1.63)        | <b>0.65(1.37)</b> | 0.76(1.55)        | 0.59(1.74)        | 0.57(1.53)        | <b>0.63(1.78)</b>   | 0.70(1.54)        | 0.54(1.87)        | <b>0.61(1.44)</b> | <b>0.75(1.59)</b> | <b>0.54(1.85)</b> | 0.49(1.69)        |
| CNOH                       | 0.64(1.74)          | 0.80(1.28)        | <b>0.65(1.59)</b> | 0.56(1.49)        | 0.73(1.62)        | 0.59(1.74)        | 0.64(1.43)        | 0.53(1.98)          | 0.69(1.58)        | 0.53(1.87)        | 0.42(1.80)        | 0.66(1.83)        | <b>0.55(1.89)</b> | 0.42(1.83)        |
| CNOS                       | 0.58(1.85)          | <b>0.82(1.23)</b> | 0.62(1.66)        | 0.58(1.47)        | 0.78(1.50)        | <b>0.65(1.65)</b> | 0.59(1.51)        | 0.47(2.09)          | 0.73(1.50)        | 0.47(1.98)        | 0.47(1.72)        | 0.72(1.72)        | 0.52(1.97)        | 0.58(1.63)        |
| CO                         | <b>0.65(1.72)</b>   | <b>0.82(1.22)</b> | 0.60(1.70)        | 0.55(1.50)        | 0.75(1.57)        | 0.59(1.76)        | 0.62(1.47)        | 0.58(1.89)          | <b>0.74(1.44)</b> | <b>0.60(1.74)</b> | 0.50(1.70)        | 0.65(1.89)        | 0.51(2.01)        | 0.58(1.58)        |
| C                          | 0.61(1.79)          | 0.80(1.27)        | 0.59(1.75)        | 0.52(1.55)        | 0.75(1.56)        | 0.64(1.68)        | 0.68(1.36)        | 0.54(2.00)          | 0.70(1.59)        | 0.51(1.89)        | 0.41(1.86)        | 0.70(1.76)        | 0.44(2.24)        | 0.55(1.59)        |
| COH                        | <b>0.67(1.69)</b>   | 0.78(1.32)        | 0.61(1.65)        | 0.55(1.51)        | 0.71(1.67)        | 0.52(1.85)        | 0.73(1.28)        | <b>0.58(1.87)</b>   | 0.70(1.55)        | 0.47(2.07)        | 0.39(1.81)        | 0.67(1.80)        | 0.44(2.08)        | 0.46(1.82)        |
| CSH                        | 0.65(1.72)          | 0.79(1.32)        | 0.56(1.74)        | 0.56(1.49)        | 0.71(1.68)        | 0.56(1.80)        | <b>0.75(1.24)</b> | 0.53(1.98)          | 0.70(1.54)        | 0.40(2.12)        | 0.53(1.62)        | 0.61(1.97)        | 0.43(2.12)        | 0.62(1.51)        |
| CNOSPFClBrI                | 0.59(1.83)          | 0.81(1.24)        | 0.62(1.66)        | 0.56(1.50)        | 0.73(1.62)        | <b>0.65(1.64)</b> | 0.61(1.48)        | 0.44(2.15)          | 0.72(1.52)        | 0.50(1.94)        | 0.36(1.86)        | 0.64(1.91)        | 0.42(2.21)        | 0.53(1.71)        |
| CNSH                       | 0.64(1.74)          | 0.77(1.35)        | 0.61(1.66)        | 0.53(1.53)        | 0.72(1.65)        | 0.62(1.70)        | 0.66(1.40)        | 0.56(1.91)          | 0.73(1.47)        | 0.49(1.96)        | 0.49(1.68)        | 0.65(1.88)        | 0.43(2.15)        | 0.62(1.53)        |
| H                          | 0.63(1.76)          | 0.79(1.30)        | 0.58(1.71)        | 0.56(1.49)        | 0.78(1.49)        | 0.53(1.83)        | 0.66(1.39)        | 0.54(1.95)          | <b>0.78(1.32)</b> | 0.44(2.11)        | 0.53(1.56)        | 0.70(1.72)        | 0.40(2.05)        | 0.54(1.63)        |
| COS                        | 0.61(1.79)          | 0.82(1.23)        | 0.60(1.72)        | 0.57(1.48)        | 0.71(1.68)        | 0.63(1.68)        | 0.60(1.50)        | 0.52(2.00)          | 0.71(1.54)        | 0.54(1.85)        | 0.50(1.65)        | 0.63(1.98)        | 0.49(2.03)        | 0.54(1.64)        |
| SH                         | 0.62(1.78)          | 0.79(1.31)        | 0.58(1.74)        | 0.61(1.43)        | 0.74(1.60)        | 0.54(1.82)        | 0.65(1.41)        | 0.55(1.91)          | 0.73(1.46)        | 0.47(1.98)        | 0.50(1.62)        | 0.69(1.75)        | 0.46(1.95)        | 0.59(1.52)        |
| CNH                        | <b>0.65(1.72)</b>   | 0.77(1.36)        | 0.60(1.69)        | 0.53(1.53)        | 0.71(1.67)        | 0.58(1.76)        | 0.66(1.39)        | 0.50(2.04)          | 0.70(1.56)        | 0.43(2.10)        | 0.51(1.62)        | 0.56(2.08)        | 0.35(2.33)        | 0.62(1.49)        |
| CH                         | 0.63(1.76)          | 0.77(1.36)        | 0.56(1.73)        | 0.54(1.52)        | 0.70(1.70)        | 0.52(1.86)        | 0.73(1.27)        | 0.46(2.11)          | 0.64(1.68)        | 0.41(2.07)        | 0.54(1.59)        | 0.62(1.91)        | 0.33(2.29)        | <b>0.66(1.42)</b> |
| NO                         | 0.65(1.72)          | 0.72(1.47)        | 0.62(1.65)        | 0.51(1.55)        | 0.59(1.95)        | 0.57(1.80)        | 0.64(1.44)        | 0.52(2.07)          | 0.62(1.75)        | 0.57(1.80)        | 0.50(1.61)        | 0.54(2.12)        | 0.38(2.28)        | <b>0.64(1.49)</b> |
| NOS                        | 0.73(1.46)          | 0.50(1.93)        | 0.49(1.59)        | 0.56(2.01)        | 0.57(1.80)        | 0.65(1.44)        | 0.53(2.03)        | 0.60(1.78)          | <b>0.57(1.79)</b> | 0.48(1.66)        | 0.48(2.27)        | 0.34(2.36)        | 0.64(1.49)        |                   |
| NS                         | 0.50(2.00)          | 0.40(1.97)        | 0.32(2.03)        | 0.41(1.67)        | 0.41(2.18)        | 0.44(1.98)        | 0.36(1.75)        | 0.50(1.99)          | 0.42(1.97)        | 0.37(1.95)        | 0.34(1.84)        | 0.23(2.45)        | 0.30(2.19)        | 0.41(1.70)        |
| OS                         | 0.54(1.94)          | 0.39(1.96)        | 0.52(1.84)        | 0.21(1.78)        | 0.04(2.41)        | 0.17(2.15)        | 0.60(1.52)        | 0.51(2.07)          | 0.37(2.00)        | <b>0.57(1.75)</b> | 0.18(1.83)        | 0.13(2.38)        | 0.15(2.21)        | 0.57(1.58)        |
| N                          | 0.45(2.04)          | 0.39(1.98)        | -                 | 0.38(1.69)        | 0.38(2.22)        | 0.42(2.01)        | 0.29(1.78)        | 0.41(2.09)          | 0.43(1.95)        | -                 | 0.39(1.73)        | 0.28(2.35)        | 0.33(2.12)        | 0.23(1.81)        |
| O                          | 0.55(1.92)          | 0.40(1.95)        | 0.37(1.96)        | 0.18(1.79)        | 0.00(2.43)        | 0.09(2.17)        | 0.59(1.55)        | 0.57(1.94)          | 0.35(2.02)        | 0.16(2.23)        | 0.12(1.82)        | 0.01(2.45)        | 0.12(2.16)        | 0.55(1.81)        |

Table A: Pearson correlation coefficients with RMSE (kcal/mol) in parentheses for predictions by different element type combinations for small-molecule characterization using alpha complex validated with 10-fold cross validation within each of the seven protein clusters in S1322. All experiments are repeated 20 times and the median Pearson correlation coefficient (RMSE in kcal/mol) are reported. The element combinations are ordered according to their average Pearson correlation coefficient in each row of the table. The top five best performing combinations for each protein cluster are highlighted in bold in each column.

\*Address correspondences to Guo-Wei Wei. E-mail:wei@math.msu.edu



|      | C                 | N                 | O                 | S                 | CN                | CO                | NO                | CNO               |
|------|-------------------|-------------------|-------------------|-------------------|-------------------|-------------------|-------------------|-------------------|
| C    | 0.49(2.63)        | 0.45(2.77)        | 0.41(2.80)        | 0.21(3.08)        | 0.52(2.56)        | 0.54(2.51)        | 0.41(2.74)        | 0.51(2.56)        |
| N    | 0.31(2.97)        | <b>0.28(3.23)</b> | <b>0.28(3.11)</b> | 0.22(2.90)        | 0.29(3.00)        | 0.36(2.91)        | <b>0.35(2.94)</b> | 0.34(2.91)        |
| O    | 0.22(3.06)        | 0.21(3.16)        | 0.24(3.11)        | 0.01(3.07)        | 0.27(3.00)        | 0.20(3.09)        | 0.22(3.12)        | 0.27(2.98)        |
| S    | 0.19(2.95)        | <b>0.20(3.01)</b> | 0.16(3.07)        | <b>0.23(2.89)</b> | 0.15(3.00)        | 0.12(3.03)        | 0.10(3.10)        | 0.10(3.12)        |
| P    | 0.09(2.96)        | 0.12(2.94)        | 0.07(2.99)        | -0.02(2.98)       | 0.10(2.96)        | 0.07(2.98)        | 0.03(2.98)        | 0.06(2.98)        |
| F    | 0.11(2.97)        | 0.09(3.00)        | 0.07(3.02)        | 0.09(2.97)        | 0.08(2.99)        | 0.15(2.94)        | 0.17(2.92)        | 0.18(2.92)        |
| Cl   | 0.15(2.94)        | 0.02(3.05)        | 0.03(3.05)        | 0.09(2.97)        | 0.17(2.93)        | 0.10(2.98)        | 0.04(3.03)        | 0.09(2.99)        |
| Br   | 0.06(2.96)        | 0.07(2.96)        | 0.01(2.99)        | 0.07(2.96)        | 0.06(2.97)        | 0.01(2.99)        | -0.01(3.03)       | 0.07(2.96)        |
| I    | 0.08(2.96)        | 0.01(2.98)        | 0.07(2.96)        | 0.11(2.95)        | 0.02(2.97)        | 0.09(2.95)        | 0.09(2.95)        | 0.07(2.96)        |
| CN   | 0.48(2.62)        | 0.47(2.72)        | 0.45(2.71)        | 0.31(2.92)        | 0.53(2.53)        | <b>0.59(2.40)</b> | 0.51(2.58)        | 0.49(2.59)        |
| CO   | 0.54(2.52)        | 0.49(2.68)        | 0.54(2.54)        | 0.27(2.96)        | <b>0.59(2.40)</b> | <b>0.60(2.39)</b> | 0.55(2.52)        | 0.51(2.59)        |
| CS   | 0.51(2.56)        | 0.44(2.80)        | 0.43(2.76)        | 0.23(3.11)        | 0.54(2.53)        | <b>0.56(2.47)</b> | 0.38(2.83)        | 0.50(2.59)        |
| NO   | 0.38(2.87)        | 0.34(3.02)        | 0.28(3.08)        | 0.15(3.07)        | 0.39(2.84)        | 0.30(2.98)        | 0.30(2.96)        | 0.30(2.97)        |
| NS   | 0.35(2.90)        | 0.26(3.24)        | 0.28(3.08)        | 0.09(3.01)        | 0.34(2.95)        | 0.41(2.80)        | 0.40(2.83)        | 0.40(2.79)        |
| OS   | 0.17(3.16)        | 0.20(3.19)        | 0.27(3.17)        | -0.06(3.15)       | 0.23(3.09)        | 0.17(3.14)        | 0.15(3.21)        | 0.29(2.94)        |
| CNO  | <b>0.56(2.51)</b> | 0.51(2.60)        | 0.48(2.67)        | 0.33(2.91)        | <b>0.61(2.37)</b> | 0.56(2.49)        | 0.55(2.51)        | <b>0.61(2.36)</b> |
| CNS  | 0.51(2.57)        | 0.45(2.76)        | 0.44(2.73)        | 0.31(2.90)        | 0.49(2.60)        | <b>0.59(2.40)</b> | 0.48(2.62)        | 0.53(2.53)        |
| COS  | <b>0.56(2.47)</b> | 0.52(2.61)        | <b>0.57(2.47)</b> | 0.27(2.97)        | <b>0.57(2.45)</b> | <b>0.61(2.37)</b> | 0.55(2.51)        | 0.54(2.53)        |
| NOS  | 0.43(2.77)        | 0.37(2.95)        | 0.32(3.04)        | 0.25(2.90)        | 0.40(2.79)        | 0.31(2.95)        | 0.32(2.94)        | 0.35(2.88)        |
| CNOS | <b>0.58(2.44)</b> | 0.51(2.64)        | 0.49(2.65)        | 0.31(2.93)        | <b>0.62(2.34)</b> | 0.54(2.53)        | <b>0.56(2.47)</b> | <b>0.59(2.42)</b> |

Table D: Pearson correlation coefficients with RMSE (kcal/mol) in parentheses for predictions of the PDBBind v2016 core set by different combinations of element types for protein (columns) and ligand (rows) using Rips complex with interactive persistent homology and  $F^C$  features based on the bins,  $\{[0, 2.5], [2.5, 3], [3, 3.5], [3.5, 4.5], [4.5, 6], [6, 12]\}$ . The models are trained with the PDBBind v2016 refined set, excluding the PDBBind v2016 core set. Only Betti-0 information is collected. The top 16 combinations are marked in bold.

|            | C                 | N                 | O                 | CN         | CO         | NO                | CNO               | CNOS              |
|------------|-------------------|-------------------|-------------------|------------|------------|-------------------|-------------------|-------------------|
| C          | 0.76(1.98)        | <b>0.79(1.96)</b> | 0.77(2.01)        | 0.76(2.02) | 0.75(2.02) | <b>0.78(1.95)</b> | 0.76(2.01)        | 0.76(2.00)        |
| N          | 0.75(2.02)        | 0.74(2.05)        | 0.75(2.07)        | 0.75(2.02) | 0.75(2.02) | 0.74(2.06)        | 0.75(2.05)        | 0.76(2.02)        |
| O          | 0.75(2.02)        | 0.72(2.12)        | 0.74(2.07)        | 0.75(2.02) | 0.73(2.09) | 0.74(2.06)        | 0.73(2.08)        | 0.74(2.06)        |
| S          | 0.70(2.15)        | 0.70(2.17)        | 0.71(2.16)        | 0.72(2.12) | 0.70(2.16) | 0.72(2.10)        | 0.71(2.13)        | 0.73(2.09)        |
| CN         | <b>0.78(1.94)</b> | <b>0.78(1.96)</b> | <b>0.78(1.98)</b> | 0.76(1.99) | 0.76(2.00) | <b>0.78(1.94)</b> | 0.77(1.97)        | <b>0.78(1.96)</b> |
| CO         | 0.76(2.00)        | 0.77(1.98)        | 0.75(2.05)        | 0.74(2.06) | 0.75(2.05) | 0.76(2.00)        | 0.75(2.04)        | 0.75(2.04)        |
| CS         | 0.77(1.96)        | <b>0.79(1.95)</b> | 0.77(2.00)        | 0.76(2.01) | 0.76(1.99) | <b>0.78(1.95)</b> | 0.77(1.99)        | 0.77(1.98)        |
| NO         | 0.73(2.09)        | 0.74(2.08)        | 0.71(2.16)        | 0.73(2.10) | 0.72(2.13) | 0.73(2.11)        | 0.72(2.11)        | 0.73(2.10)        |
| NS         | 0.72(2.09)        | 0.72(2.12)        | 0.72(2.13)        | 0.71(2.12) | 0.70(2.14) | 0.72(2.11)        | 0.70(2.16)        | 0.71(2.13)        |
| OS         | 0.74(2.03)        | 0.73(2.09)        | 0.75(2.04)        | 0.74(2.03) | 0.72(2.10) | 0.74(2.05)        | 0.73(2.07)        | 0.74(2.04)        |
| CNO        | 0.75(2.03)        | 0.77(1.99)        | 0.76(2.05)        | 0.74(2.06) | 0.73(2.08) | 0.75(2.03)        | 0.75(2.04)        | 0.76(2.04)        |
| CNS        | <b>0.78(1.93)</b> | <b>0.78(1.95)</b> | <b>0.78(1.98)</b> | 0.76(1.99) | 0.76(1.99) | <b>0.78(1.94)</b> | <b>0.77(1.96)</b> | <b>0.78(1.95)</b> |
| COS        | 0.76(1.99)        | <b>0.78(1.97)</b> | 0.76(2.04)        | 0.75(2.04) | 0.75(2.04) | 0.76(1.99)        | 0.76(2.03)        | 0.76(2.02)        |
| NOS        | 0.74(2.06)        | 0.74(2.07)        | 0.71(2.17)        | 0.73(2.09) | 0.71(2.13) | 0.73(2.10)        | 0.72(2.12)        | 0.73(2.10)        |
| CNOS       | 0.75(2.03)        | 0.77(2.00)        | 0.75(2.06)        | 0.74(2.05) | 0.73(2.08) | 0.75(2.03)        | 0.75(2.03)        | 0.76(2.02)        |
| CNOSFCIBrI | 0.75(2.03)        | 0.77(1.99)        | 0.75(2.08)        | 0.74(2.05) | 0.75(2.06) | 0.75(2.04)        | 0.76(2.03)        | 0.76(2.02)        |

Table E: Pearson correlation coefficients with RMSE (kcal/mol) in parentheses for predictions of the PDBBind v2016 core set by different combinations of element types for protein (columns) and ligand (rows) using alpha complex with  $F^S$  features. The models are trained with the PDBBind v2016 refined set, excluding the PDBBind v2016 core set. Betti-0, Betti-1, and Betti-2 barcodes are considered. The top 16 combinations are marked in bold.

| Target        | Proteins excluded from training set of the target                                                                           |
|---------------|-----------------------------------------------------------------------------------------------------------------------------|
| ACE           | ACE, ADA, COMT, PDE5, ALR2,                                                                                                 |
| AChE          | AChE, ALR2, AmpC, COX1, COX2, GPB, HIVPR, HIVRT, HMGR, InhA, NA, PARR, PNP, SAHH, FXa,                                      |
| ADA           | ACE, ADA, COMT, PDE5,                                                                                                       |
| ALR2          | AChE, ALR2, AmpC, COX1, COX2, GPB, HIVPR, HIVRT, HMGR, InhA, NA, PARR, PNP, SAHH, GART, ACE, RXRa, PPARg, AmpC, COX1, COX2, |
| AmpC          | AChE, ALR2, AmpC, COX1, COX2, GPB, HIVPR, HIVRT, HMGR, InhA, NA, PARR, PNP, SAHH, GART, ACE, RXRa, PPARg, ALR2, COX1, COX2, |
| AR            | AR, TK, ADA, ALR2, PARR, PNP, SAHH, ER_agonist, ER_antagonist, GR, MR, PPARg, PR, RXRa,                                     |
| CDK2          | CDK2, EGFr, FGF1, HSP90, P38 MAP, PDGFrb, SRC, TK, VEGF2,                                                                   |
| COMT          | ACE, ADA, COMT, PDE5, RXRa, ALR2, AmpC, PNP,                                                                                |
| COX1          | AChE, ALR2, AmpC, COX1, COX2, GPB, HIVPR, HIVRT, HMGR, InhA, NA, PARR, PNP, SAHH, ALR2, COX2,                               |
| COX2          | AChE, ALR2, AmpC, COX1, COX2, GPB, HIVPR, HIVRT, HMGR, InhA, NA, PARR, PNP, SAHH, HSP90, ALR2, PARR,                        |
| DHFR          | GART, DHFR, PPARg,                                                                                                          |
| EGFr          | CDK2, EGFr, FGF1, HSP90, P38 MAP, PDGFrb, SRC, TK, VEGF2,                                                                   |
| ER_agonist    | ER_agonist, PNP, AR, ER_antagonist, GR, MR, PPARg, PR, RXRa,                                                                |
| ER_antagonist | AR, ER_agonist, ER_antagonist, GR, MR, PPARg, PR, RXRa,                                                                     |
| FGF1          | CDK2, EGFr, FGF1, HSP90, P38 MAP, PDGFrb, SRC, TK, VEGF2,                                                                   |
| FXa           | FXa, thrombin, trypsin, DHFR, GART,                                                                                         |
| GART          | GART, DHFR, PPARg,                                                                                                          |
| GPB           | AChE, ALR2, AmpC, COX1, COX2, GPB, HIVPR, HIVRT, HMGR, InhA, NA, PARR, PNP, SAHH, COMT,                                     |
| GR            | AR, ER_agonist, ER_antagonist, GR, MR, PPARg, PR, RXRa,                                                                     |
| HIVPR         | AChE, ALR2, AmpC, COX1, COX2, GPB, HIVPR, HIVRT, HMGR, InhA, NA, PARR, PNP, SAHH,                                           |
| HIVRT         | AChE, ALR2, AmpC, COX1, COX2, GPB, HIVPR, HIVRT, HMGR, InhA, NA, PARR, PNP, SAHH, PNP,                                      |
| HMGR          | AChE, ALR2, AmpC, COX1, COX2, GPB, HIVPR, HIVRT, HMGR, InhA, NA, PARR, PNP, SAHH, RXRa, ACE, GART, ALR2, AmpC, COX1,        |
| HSP90         | CDK2, EGFr, FGF1, HSP90, P38 MAP, PDGFrb, SRC, TK, VEGF2,                                                                   |
| InhA          | AChE, ALR2, AmpC, COX1, COX2, GPB, HIVPR, HIVRT, HMGR, InhA, NA, PARR, PNP, SAHH,                                           |
| MR            | AR, ER_agonist, ER_antagonist, GR, MR, PPARg, PR, RXRa, PARR,                                                               |
| NA            | AChE, ALR2, AmpC, COX1, COX2, GPB, HIVPR, HIVRT, HMGR, InhA, NA, PARR, PNP, SAHH, PPARg, thrombin, trypsin, ADA,            |
| P38 MAP       | CDK2, EGFr, FGF1, HSP90, P38 MAP, PDGFrb, SRC, TK, VEGF2,                                                                   |
| PARP          | AChE, ALR2, AmpC, COX1, COX2, GPB, HIVPR, HIVRT, HMGR, InhA, NA, PARR, PNP, SAHH, COX1, PNP,                                |
| PDE5          | ACE, ADA, COMT, PDE5, P38 MAP,                                                                                              |
| PDGFrb        | CDK2, EGFr, FGF1, HSP90, P38 MAP, PDGFrb, SRC, TK, VEGF2,                                                                   |
| PNP           | AChE, ALR2, AmpC, COX1, COX2, GPB, HIVPR, HIVRT, HMGR, InhA, NA, PARR, PNP, SAHH, TK, ADA, COMT, COX1, GPB, PARR, SAHH,     |
| PPARg         | AR, ER_agonist, ER_antagonist, GR, MR, PPARg, PR, RXRa,                                                                     |
| PR            | AR, ER_agonist, ER_antagonist, GR, MR, PPARg, PR, RXRa,                                                                     |
| RXRa          | AR, ER_agonist, ER_antagonist, GR, MR, PPARg, PR, RXRa, COX1,                                                               |
| SAHH          | AChE, ALR2, AmpC, COX1, COX2, GPB, HIVPR, HIVRT, HMGR, InhA, NA, PARR, PNP, SAHH, TK, ADA, COMT, COX1, PARR, GPB, PNP,      |
| SRC           | CDK2, EGFr, FGF1, HSP90, P38 MAP, PDGFrb, SRC, TK, VEGF2, PDE5,                                                             |
| thrombin      | FXa, thrombin, trypsin, DHFR, ER_antagonist,                                                                                |
| TK            | CDK2, EGFr, FGF1, HSP90, P38 MAP, PDGFrb, SRC, TK, VEGF2, ADA, COMT, ALR2, COX1, GPB, PARR, PNP, SAHH,                      |
| trypsin       | FXa, thrombin, trypsin, PPARg, ADA, DHFR,                                                                                   |
| VEGF2         | CDK2, EGFr, FGF1, HSP90, P38 MAP, PDGFrb, SRC, TK, VEGF2,                                                                   |

Table F: List of proteins that are excluded from the training set of each target in the DUD dataset.

| Run #  | EF <sub>2%</sub> | EF <sub>20%</sub> | AUC    |
|--------|------------------|-------------------|--------|
| 1      | 8.63             | 3.42              | 0.830  |
| 2      | 8.57             | 3.47              | 0.832  |
| 3      | 8.61             | 3.43              | 0.830  |
| 4      | 8.52             | 3.42              | 0.831  |
| 5      | 8.36             | 3.47              | 0.834  |
| 6      | 8.39             | 3.45              | 0.833  |
| 7      | 8.59             | 3.43              | 0.831  |
| 8      | 8.94             | 3.47              | 0.832  |
| 9      | 8.77             | 3.42              | 0.832  |
| 10     | 8.62             | 3.46              | 0.832  |
| Median | 8.60             | 3.45              | 0.832  |
| Std    | 0.16             | 0.02              | 1.2E-3 |

Table G: The DUD test results of TopVS-ML for each repeated run. Median and Std are the median value and the standard deviation across repeated runs.

| Target                | ADV  | LIG  | COM  | ALL  |
|-----------------------|------|------|------|------|
| AR                    | 0.81 | 0.83 | 0.93 | 0.90 |
| COX2                  | 0.86 | 0.97 | 0.80 | 0.97 |
| DHFR                  | 0.82 | 0.95 | 0.94 | 0.96 |
| ER <sub>agonist</sub> | 0.84 | 0.69 | 0.91 | 0.81 |
| MR                    | 0.82 | 0.78 | 0.91 | 0.89 |
| PPAR <sub>g</sub>     | 0.82 | 0.70 | 0.72 | 0.72 |
| RXR <sub>α</sub>      | 0.95 | 0.74 | 0.91 | 0.79 |
| SAHH                  | 0.80 | 0.81 | 0.72 | 0.84 |
| Average               | 0.84 | 0.81 | 0.86 | 0.86 |

Table H: The AUC for autodock vina, TopVS-ML with only compound features, TopVS-ML with only protein-compound complex features, and TopVS-ML with all features. The targets with high quality results by Autodock Vina are reported (AUC > 0.8)

| Target  | ADV  | LIG  | COM  | ALL  |
|---------|------|------|------|------|
| ACE     | 0.42 | 0.85 | 0.78 | 0.81 |
| ADA     | 0.49 | 0.89 | 0.89 | 0.89 |
| AmpC    | 0.34 | 0.56 | 0.37 | 0.53 |
| FGFr1   | 0.44 | 0.97 | 0.71 | 0.95 |
| GPB     | 0.48 | 0.70 | 0.69 | 0.71 |
| NA      | 0.37 | 0.79 | 0.82 | 0.84 |
| PDGFrb  | 0.32 | 0.98 | 0.90 | 0.96 |
| Average | 0.41 | 0.82 | 0.74 | 0.81 |

Table I: The AUC for autodock vina, TopVS-ML with only compound features, TopVS-ML with only protein-compound complex features, and TopVS-ML with all features. The targets with low quality results by Autodock Vina are reported (AUC < 0.5)
